# Supplementary material
Source: Springer Nature journal article supplement (https://www.springermedizin.de/resource/supplementary/12865_2009_271_MOESM4_ESM.pdf/9427650)

**Donor**

**17**

**19**

**Fraction**

**2**

**3**

**4**

**5**

**2**

**3**

**4**

**5**

**Mw(x10<sup>5</sup>)**

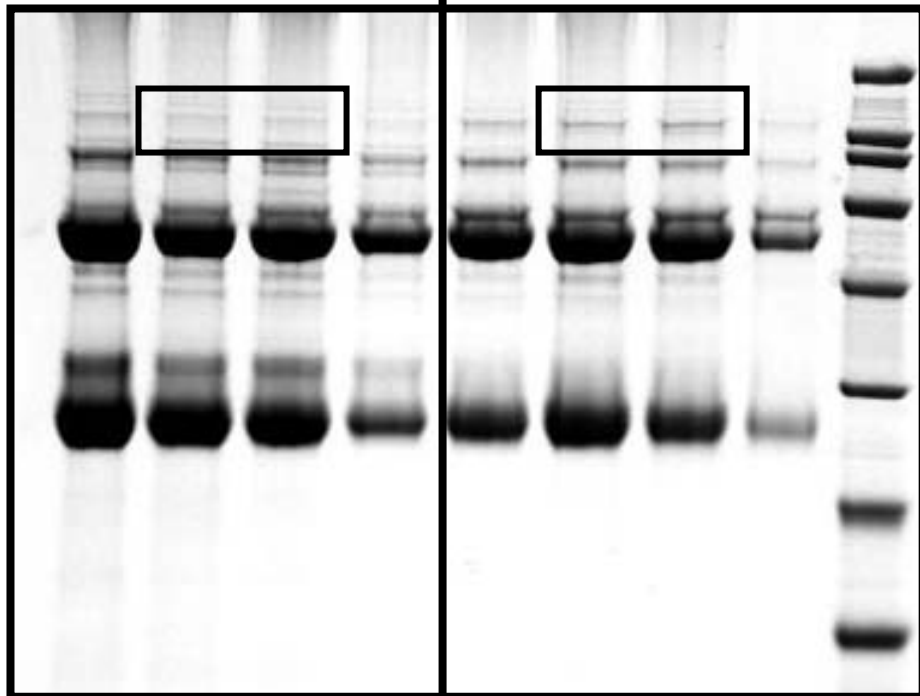

2.1

1.2

1.0

0.7

0.5

0.3

0.2

0.1

Supplement: MOESM4 [file 9427650]
